# Supplementary material for: Albendazole induces immunotherapy response by facilitating ubiquitin-mediated PD-L1 degradation
Source: PubMed Central journal article supplement (PMC9115032; doi:10.1136/jitc-2021-003819), 2022-05-16
Supplement: jitc-2021-003819supp001.pdf [file jitc-2021-003819supp001.pdf]

## Graphical Abstract

**Albendazole induces immunotherapy response by facilitating ubiquitin-mediated PD-L1 degradation**

Lin Zhu, Xinwei Kuang, Guanxiong Zhang, Long Liang, Dandan Liu, Bin Hu, Zuozhong Xie, Hui Li, Hong Liu, Mao Ye, Xiang Chen, Jing Liu

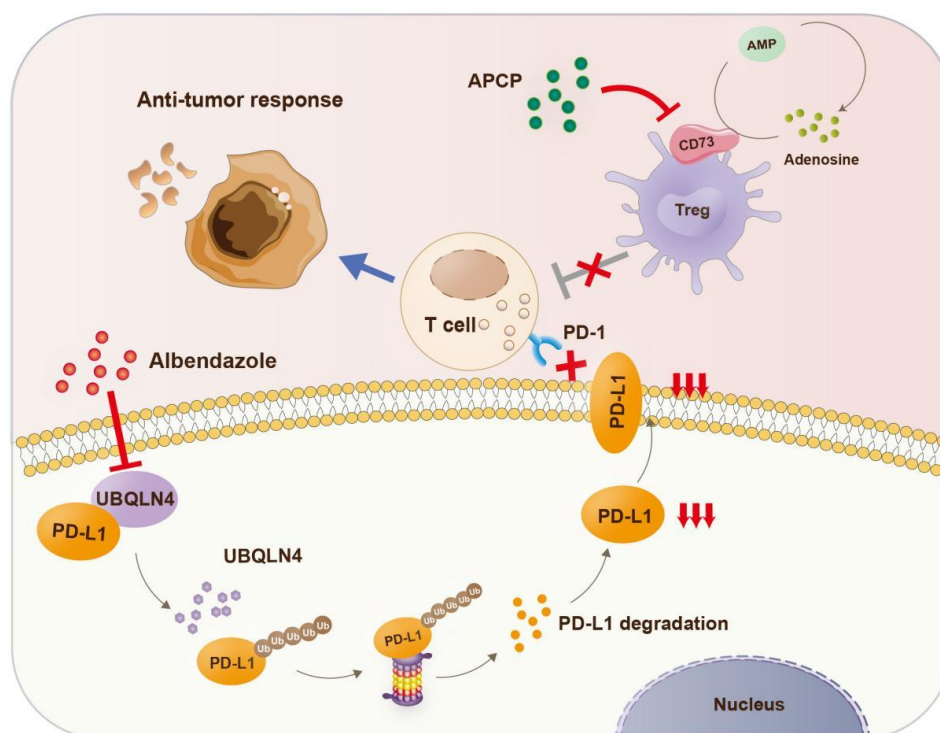

Our findings revealed a novel role of ABZ in anti-tumor immunity by suppressing the UBQLN4-mediated stabilization of PD-L1 protein and inducing ubiquitin-mediated PD-L1 protein degradation, thereby provided a potential predictor kit (UBQLN4/PD-L1) for assessing the efficacy of anti-PD-1 therapy in clinic and a novel therapeutic strategy by combination treatment of ABZ and CD73 blockade.
