# Supplementary material for: Albendazole induces immunotherapy response by facilitating ubiquitin-mediated PD-L1 degradation
Source: PubMed Central journal article supplement (PMC9115032; doi:10.1136/jitc-2021-003819), 2022-05-16
Supplement: jitc-2021-003819supp002.pdf [file jitc-2021-003819supp002.pdf]

## Supplementary Figure 1

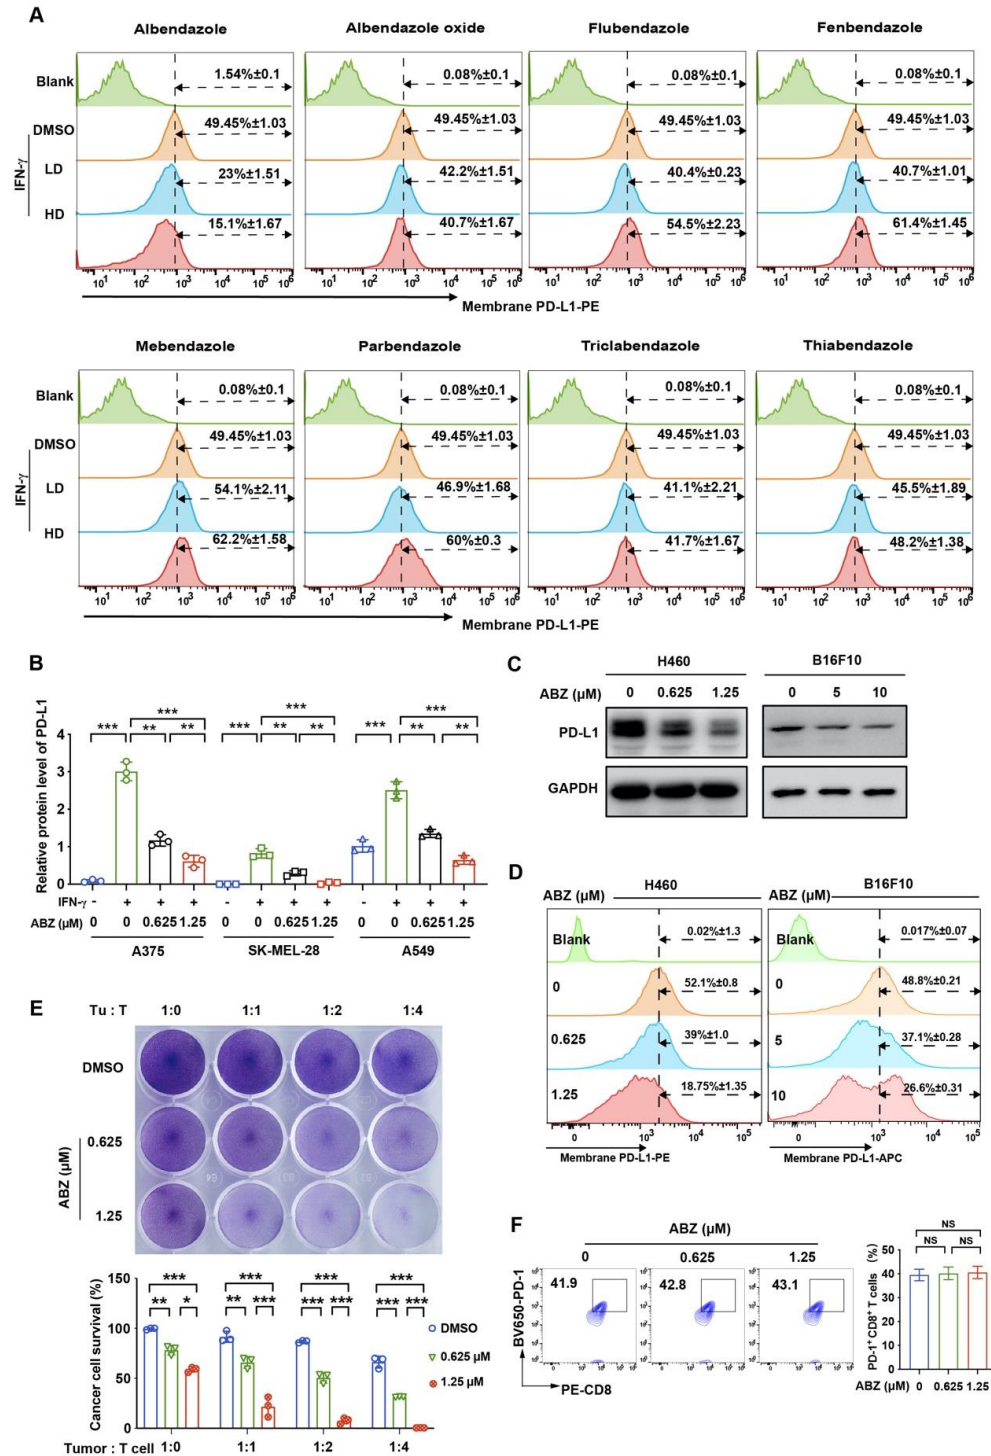

A. Representative profiles and quantitative analysis of flow cytometry analysis of membrane PD-L1 expression in A375 cells treated with low dose (LD) and high dose (HD) of 8 kinds of imidazoles for 24 h under IFN- $\gamma$  exposure. B. Quantitative analysis of PD-L1 protein level in A375, SK-MEL-28 and A549 treated with increasing concentrations of ABZ (0.625 to 1.25  $\mu$ M) for 24 h under IFN- $\gamma$  exposure, each bar represents the mean $\pm$ S.D of three independent experiments, \* $p$ <0.05, \*\* $p$ <0.01, \*\*\* $p$ <0.001. C. Representative western blotting of PD-L1 protein level in H460 and B16F10 cells treated with increasing concentrations of ABZ for 24 h. D. Representative profiles and quantitative analysis of membrane PD-L1 expression by flow-cytometric analysis after increasing concentrations of ABZ treated H460 and B16F10 cells for 24 h. E. co-cultured with activated T cells for 24 h with or without ABZ (0.625 to 1.25  $\mu$ M) were subjected to crystal violet staining. The tumor cell to T cell ratio, 1:0, 1:1, 1:2, 1:4. The quantitative analysis of H460 cell survive rate from three independent experiments and showed as means $\pm$ SD, \* $p$ <0.05, \*\* $p$ <0.01, \*\*\* $p$ <0.001. F. Representative profiles and quantification of flow cytometry-based detection of the PD-1<sup>+</sup> in CD8<sup>+</sup> TILs after increasing concentrations of ABZ treated T cells for 24 h. Data represent mean $\pm$ SD, <sup>NS</sup> $p$ >0.05.

## Supplementary Figure 2

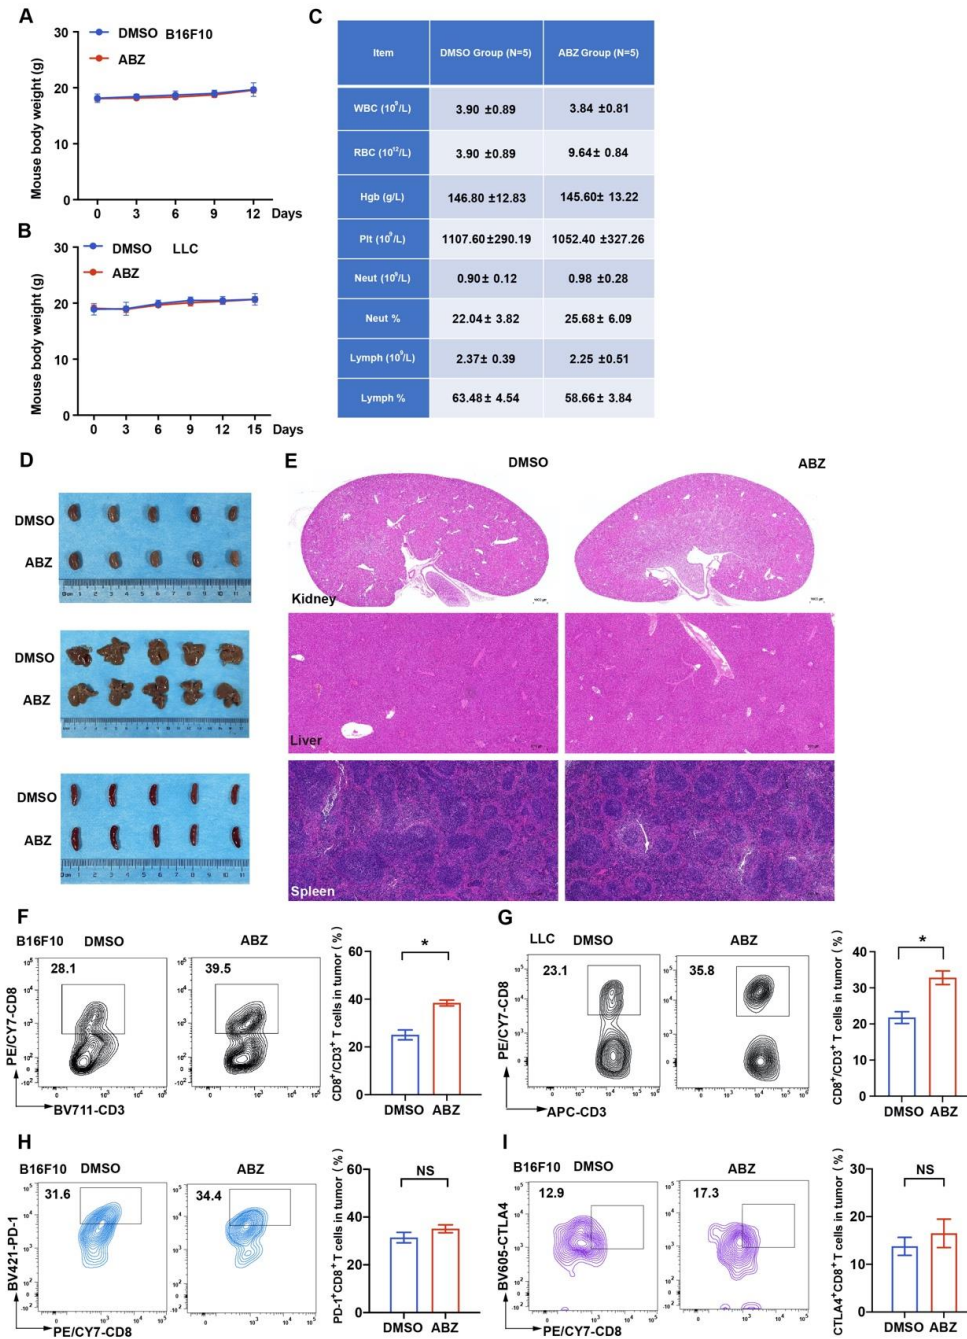

A-B. Mice weight was measured on the indicated different time points after C57BL/6 mice were implanted with  $1 \times 10^6$  B16F10 (A) or  $1 \times 10^6$  LLC (B) and received 50 mg/kg of ABZ treatment. C. The blood routine examination was detected on the day

of LLC tumors were harvested. D-E. The morphology (D) and organizational structure (E) of kidney, liver, and spleen of LLC mice model treated with ABZ or DMSO were observed by H&E staining after euthanizing the mice. F-G. Representative profiles and quantification of flow cytometry-based detection of the CD8<sup>+</sup> in CD3<sup>+</sup> TILs in B16F10 (F) and LLC (G) tumor mass from the different treatment groups (n=5 mice per group). Data represent mean±SD, \*p<0.05. H-I. Representative profiles and quantification of flow cytometry-based detection of the PD-1<sup>+</sup> (H) and CTLA4 (I) in CD8<sup>+</sup> TILs in B16F10 tumor mass from the different treatment groups (n=5 mice per group). Data represent mean±SD, <sup>NS</sup>p>0.05.

## Supplementary Figure 3

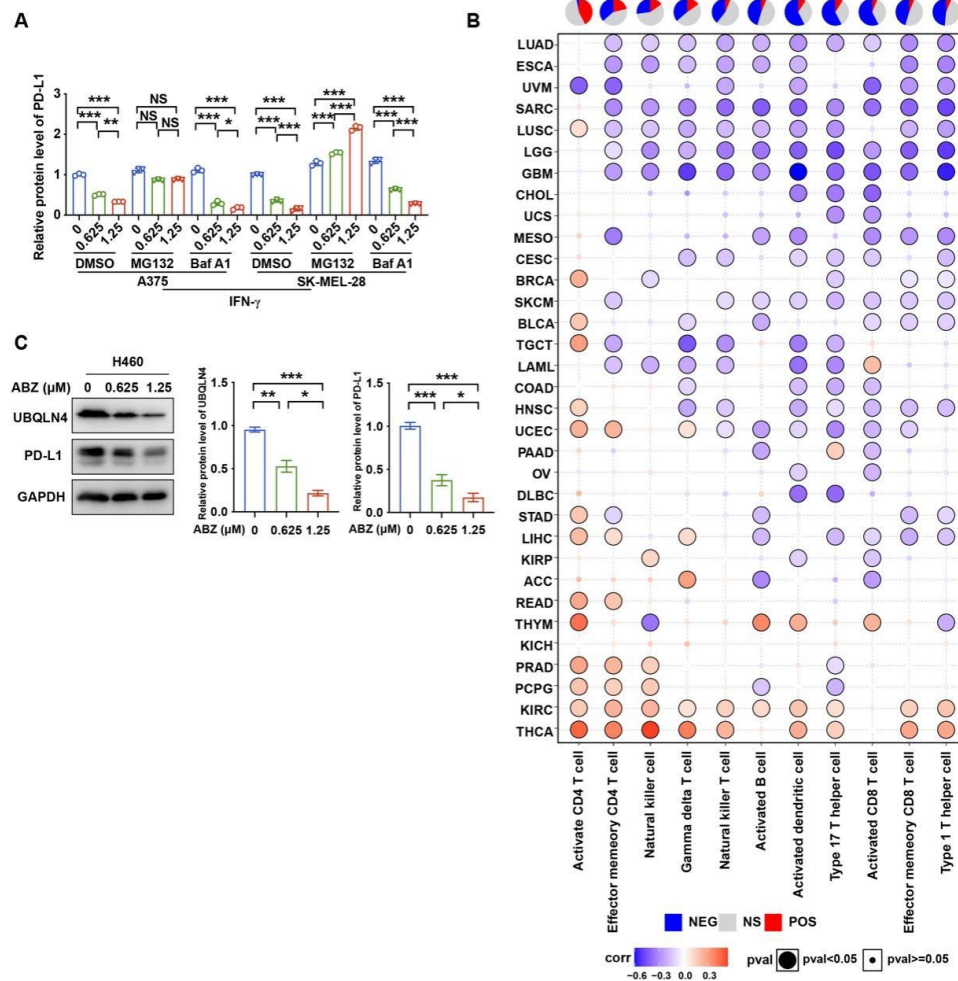

A. Quantitative analysis of PD-L1 protein expression in A375 and SK-MEL-28 cells, which were pretreated with Baf A1 (100 nM) and MG132 (10  $\mu$ M) for 6 h then treated with increasing concentrations of ABZ (0.625 to 1.25  $\mu$ M) and the PD-L1 protein level were detected by western blotting, each bar represents the mean $\pm$ S.D of three independent experiments, <sup>NS</sup>p>0.05, \*p<0.05, \*\*p<0.01, \*\*\*p<0.001. B. Significantly correlation between UBQLN4 expression level and infiltration of the activated immune cell across 33 cancer types from TCGA. Pie charts summarized the proportion of cancer types with positive (Rs > 0 and pvalue < 0.05, in red), negative (Rs < 0 and pvalue < 0.05, in blue), or non-significant (in gray) correlation in 33

cancer types. Spearman's correlation test were performed, black border, \* $p < 0.05$ . C. Representative western blotting and quantitative analysis of UBQLN4 and PD-L1 protein levels in H460 cells treated with increasing concentrations of ABZ (0.625 to 1.25  $\mu\text{M}$ ) for 24 h, each bar represents the mean  $\pm$ S.D of three independent experiments, \* $p < 0.05$ , \*\* $p < 0.01$ , \*\*\* $p < 0.001$ .

Supplementary Figure 4

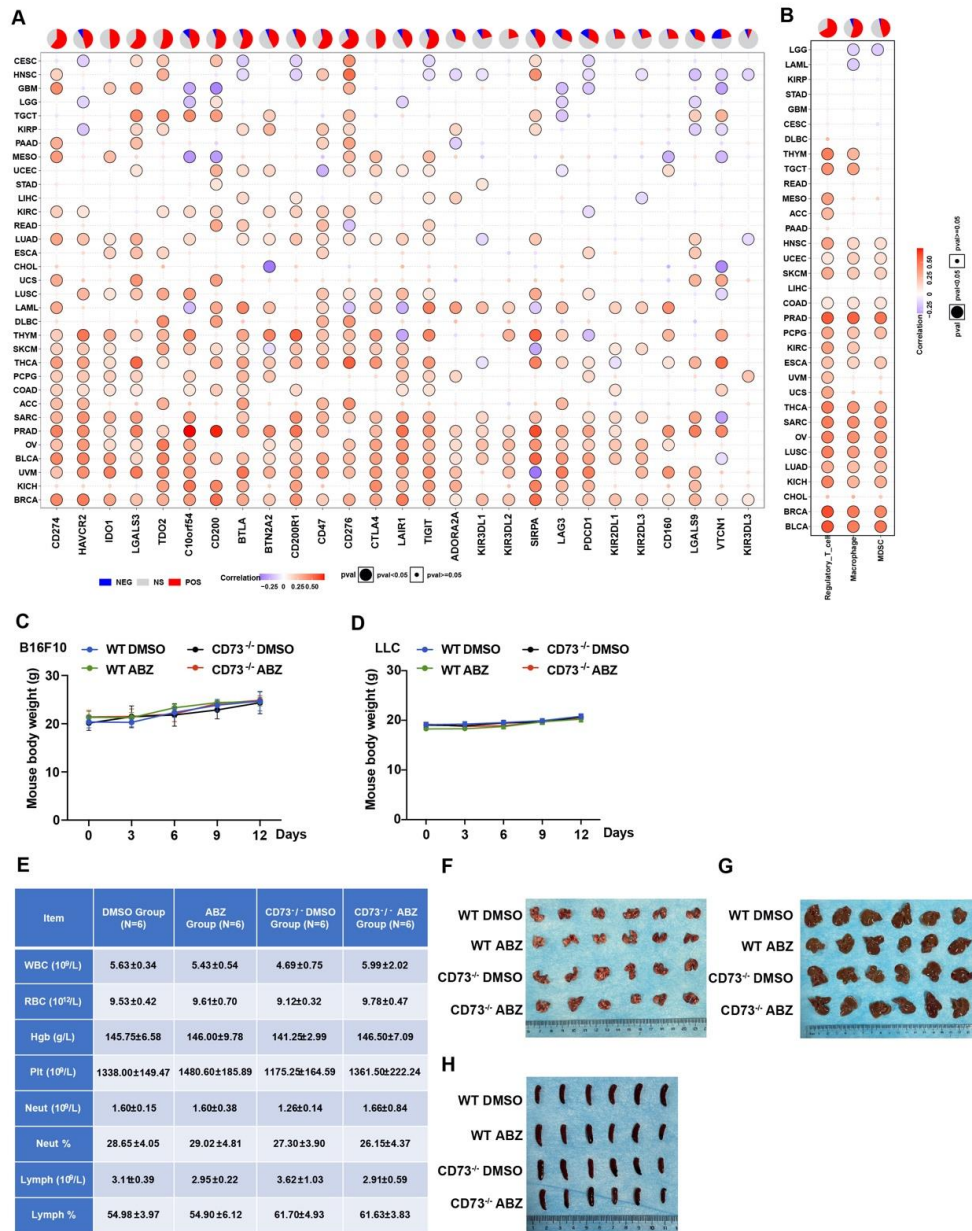

A-B. Significant correlation for inhibitory immune checkpoints (A) or suppressive immune cell types (B) and CD73 expression level across 33 cancer types from TCGA. Spearman's correlation test were performed, black border, \*p < 0.05. Pie charts

summarized the proportion of cancer types with positive ( $R_s > 0$  and  $pvalue < 0.05$ , in red), negative ( $R_s < 0$  and  $pvalue < 0.05$ , in blue), or non-significant (in gray) correlation in 33 cancer types. C-D. Mice weight was measured on the indicated different time points after CD73 WT and KO mice ( $n=6$  mice per group) were implanted with  $1 \times 10^6$  B16F10 (C) or  $1 \times 10^6$  LLC (D) and received 50 mg/kg of ABZ treatment. E. The blood routine examination of CD73 WT and KO mice ( $n=6$  mice per group) treated with ABZ or DMSO was detected on the day of LLC tumors were harvested. F-H. The morphology of lung (F), liver (G), and spleen (H) of CD73 WT and KO mice ( $n=6$  mice per group) treated with ABZ or DMSO were observed after euthanizing the mice.



## Supplementary Figure 5

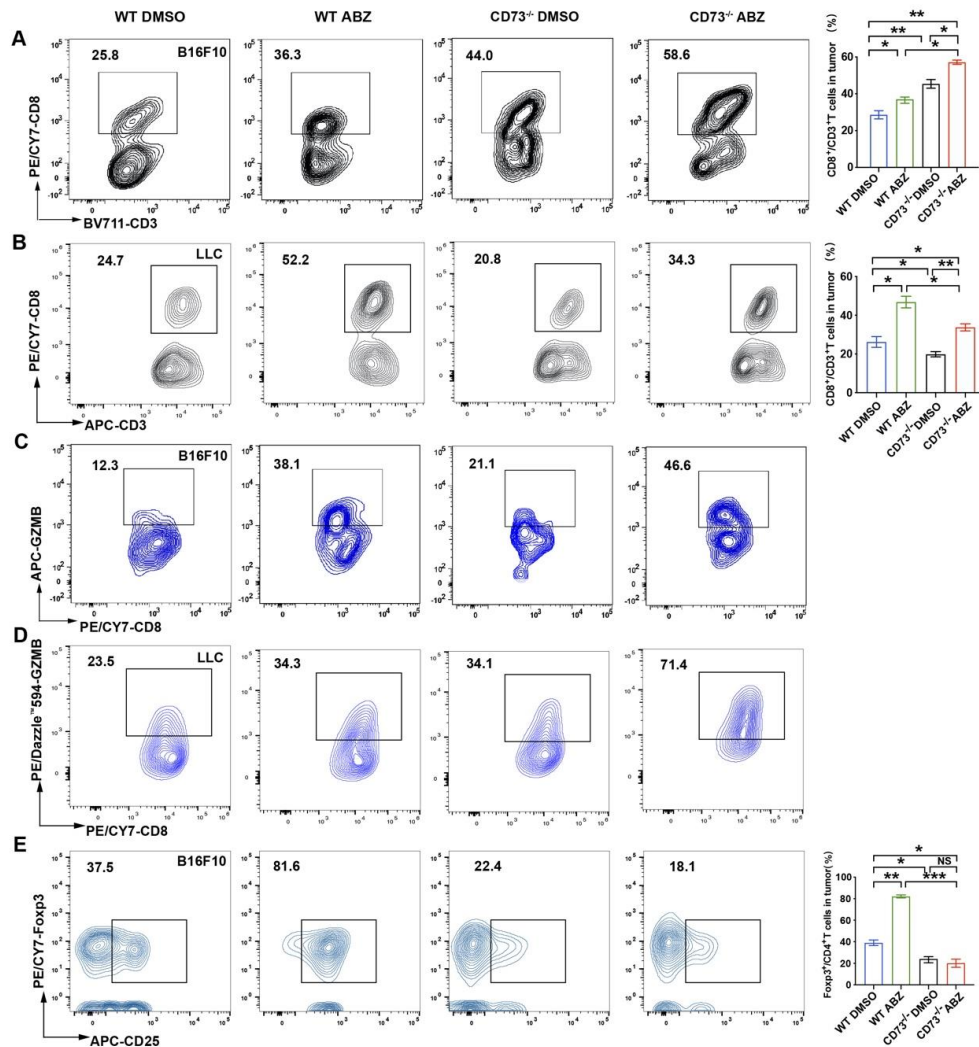

A-B. Representative profiles and quantification of flow cytometry-based detection of the CD8<sup>+</sup> in CD3<sup>+</sup> tumor infiltrates lymphocytes (TILs) in B16F10 (A) and LLC (B) tumor mass from the different treatment groups (n=5 mice per group). All data represent mean±SD, \*p<0.05, \*\*p<0.01. C-D. Representative profiles of flow cytometry-based detection of the GZMB<sup>+</sup> CD8<sup>+</sup> in CD3<sup>+</sup> TILs from B16F10 (C) and LLC (D) tumor mass. E. Representative profiles and quantification of flow cytometry-based detection of the Foxp3<sup>+</sup> in CD4<sup>+</sup> TILs in B16F10 tumor mass from the different treatment groups (n=5 mice per group). All data represent mean±SD, NS p>0.05, \*p < 0.05, \*\*p<0.01, \*\*\*p<0.001.

## Supplementary Figure 6

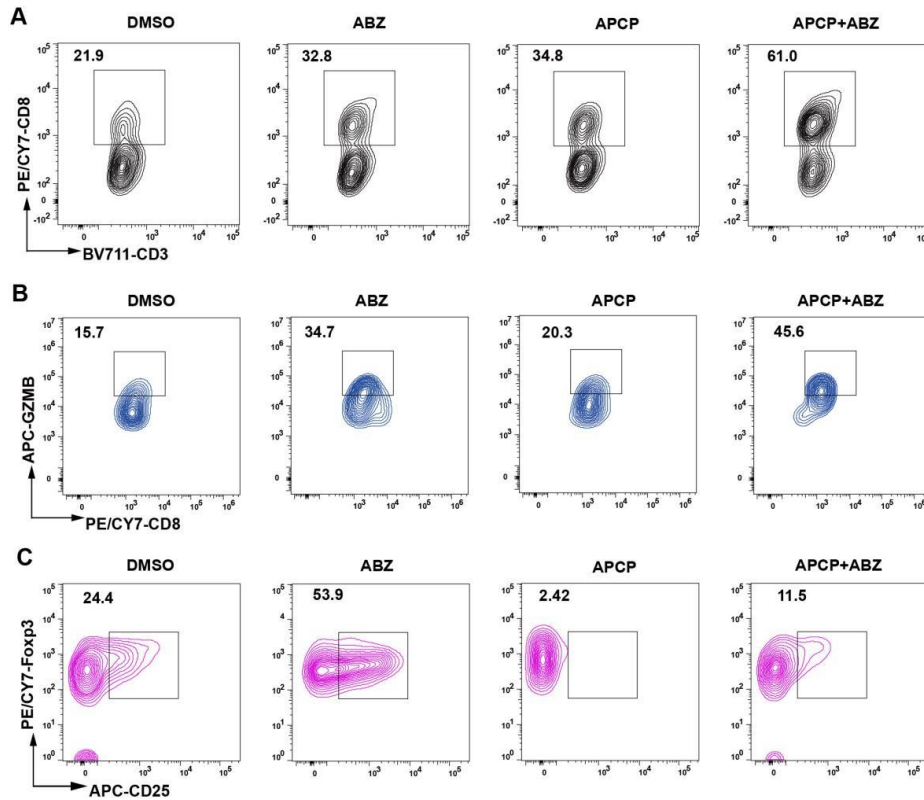

A. Representative profiles of flow cytometry-based detection of the CD8<sup>+</sup> in CD3<sup>+</sup> TILs in B16F10 tumor mass from the different treatment groups. B. Representative profiles of flow cytometry-based detection of the GZMB<sup>+</sup>CD8<sup>+</sup> in CD3<sup>+</sup> TILs from the B16F10 tumor mass. C. Representative profiles of flow cytometry-based detection of the FOXP3<sup>+</sup> in CD4<sup>+</sup> TILs in B16F10 tumor mass from the different treatment groups.

Supplementary Figure 7

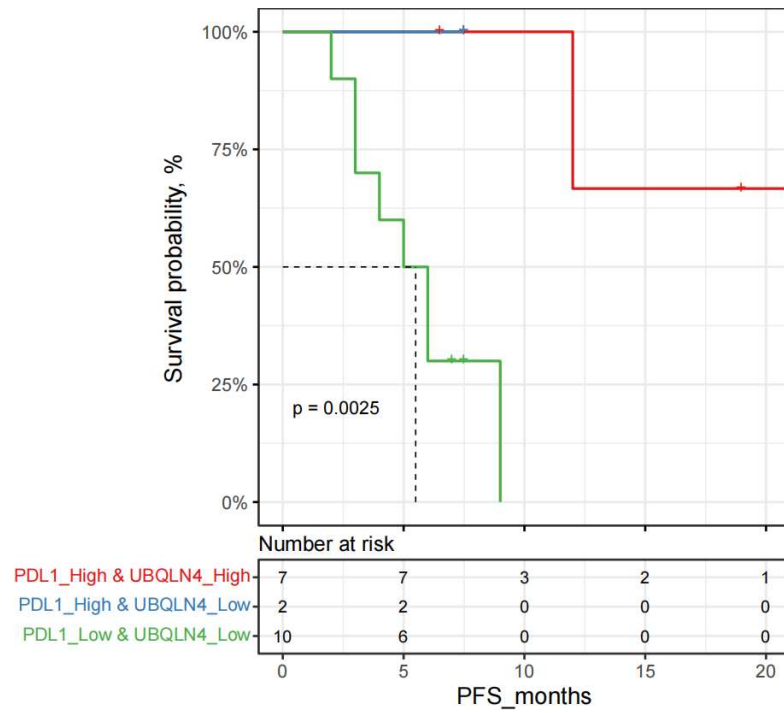

Melanoma patients with low UBQLN4 and low PD-L1 expression showed the worst efficacy of PD-1 mAb therapy.

**Supplementary Table 1. Reagent or resource source identifier.**

| REAGENT or RESOURCE                           | SOURCE                    | IDENTIFIER                   |
|-----------------------------------------------|---------------------------|------------------------------|
| <b>Antibodies</b>                             |                           |                              |
| Trustain fcX anti-mouse CD16/CD32             | BioLegend                 | Cat# 101320                  |
| Zombie Aqua™ Fixable Viability Kit            | BioLegend                 | Cat#423102                   |
| APC/Cy7 anti-mouse CD45                       | BioLegend                 | Cat#103116                   |
| Brilliant Violet 711 anti-mouse CD3           | BioLegend                 | Cat#100241                   |
| APC anti-mouse CD3                            | BioLegend                 | Cat#100236                   |
| PerCP/Cyanine5.5 anti-mouse CD4               | BioLegend                 | Cat#100434                   |
| PE/Cy7 anti-mouse CD8a                        | BioLegend                 | Cat#100722                   |
| APC anti-mouse GZMB                           | BioLegend                 | Cat#372204                   |
| PE/Dazzle™594 anti-mouse GZMB                 | BioLegend                 | Cat#372216                   |
| Brilliant Violet 605 anti-mouse CTLA4         | BioLegend                 | Cat#369610                   |
| Brilliant Violet 421 anti-mouse PD1           | BioLegend                 | Cat#135218                   |
| Brilliant Violet 421 anti-mouse CD274 (PD-L1) | BioLegend                 | Cat#124315                   |
| APC anti-mouse PD-L1                          | BioLegend                 | Cat#124312                   |
| APC anti-mouse CD25                           | Ebioscience               | Cat#17-0251-82               |
| PE/Cyanine7 anti-mouse FOXP3                  | Ebioscience               | Cat#25-5773-82               |
| PE anti-human CD274 (PD-L1)                   | BioLegend                 | Cat#329706                   |
| PE anti-human CD8                             | BioLegend                 | Cat#980902                   |
| Brilliant Violet 650™ anti-human CD279 (PD-1) | BioLegend                 | Cat#367429                   |
| APC/Cyanine7 anti-human CD3                   | BioLegend                 | Cat#300317                   |
| Human TruStain FcX                            | BioLegend                 | Cat#422302                   |
| Human anti-PD-L1-Rb                           | Abcam                     | Cat#ab213524<br>Cat#ab205921 |
| PD-L1 (E1L3N®) XP® Rabbit mAb                 | Cell Signaling Technology | Cat#13684                    |
| PD-L1/CD274 Monoclonal Antibody               | Proteintech               | Cat#66248-1-Ig               |

|                                                                        |                           |                 |
|------------------------------------------------------------------------|---------------------------|-----------------|
| UBQLN4 Antibody (A333, A1UP)                                           | Santa Cruz                | Cat#sc-136145   |
|                                                                        | Biotechnology             |                 |
| Ubiquitin Antibody (P4D1)                                              | Santa Cruz                | Cat#sc-8017     |
|                                                                        | Biotechnology             |                 |
| GAPDH Antibody (A-3)                                                   | Santa Cruz                | Cat#sc137179    |
|                                                                        | Biotechnology             |                 |
| GAPDH Monoclonal Antibody                                              | Proteintech               | Cat#60004-1-Ig  |
| HA-Tag antibody                                                        | Cell Signaling Technology | Cat#3724        |
| His-Tag antibody                                                       | Cell Signaling Technology | Cat#12698       |
| Peroxidase AffiniPure Goat Anti-Mouse IgG (H+L)                        | Jackson ImmunoResearch    | Cat#115-035-146 |
| Peroxidase AffiniPure Goat Anti-Rabbit IgG (H+L)                       | Jackson ImmunoResearch    | Cat#111-035-144 |
| BeyoECL Star                                                           | Beyotime                  | Cat#P0018AM     |
|                                                                        | Biotechnology             |                 |
| <hr/> <b>Chemicals, peptides, and recombinant proteins</b> <hr/>       |                           |                 |
| Albendazole (SKF-62979)                                                | Selleck                   | Cat#S1640       |
|                                                                        | Chemicals                 |                 |
| MG132                                                                  | Selleck                   | Cat#S2619       |
|                                                                        | Chemicals                 |                 |
| Bafilomycin A1 (Baf-A1)                                                | Selleck                   | Cat#S1413       |
|                                                                        | Chemicals                 |                 |
| Cycloheximide                                                          | MCE                       | Cat#HY-12320    |
| Dimethyl sulfoxide ( DMSO)                                             | Sigma-Aldrich             | Cat# D8418      |
| Adenosine 5'-( $\alpha,\beta$ -methylene)diphosphate sodium salt(APCP) | Tocris                    | Cat# 3633       |
| Recombinant Human IFN-gamma Protein                                    | R&D Systems               | Cat#285-IF      |

|                                           |               |                 |
|-------------------------------------------|---------------|-----------------|
| Isolation of peripheral blood lymphocytes | Tbdscience    | Cat#LTS1077     |
| CTSTM AIIM VTM SFM                        | Gibco         | Cat#A3021002    |
| Immuno Cult Human                         | STEMCELL      | Cat#10970       |
| CD3/CD28/CD2 T cell activator             | Technologies  |                 |
| Recombinant Human IL-2                    | R&D Systems   | Cat#202-1L-050  |
| TRIzol™ Reagent                           | Invitrogen™   | Cat#15596018    |
| SuperScript III First-Strand              | Invitrogen™   | Cat#18080051    |
| RIPA Lysis buffer                         | Beyotime      | Cat#P0013B      |
|                                           | Biotechnology |                 |
| Cell lysis buffer for Western and IP      | Beyotime      | Cat#P0013       |
|                                           | Biotechnology |                 |
| Pierce™ BCA Protein Assay Reagent kit     | Thermo        | Cat#23228; Cat# |
|                                           | Scientific™   | 23224           |
| Nitrocellulose (NC) membranes             | Merck KGaA    | Cat#Z358657     |
| PhosStop                                  | Roche         | Cat#4906845001  |
| Cocktail                                  | Roche         | Cat#1183614500  |
|                                           |               | 1               |
| Protein A/G magnetic beads                | Bimake        | Cat#B23201      |
| Anti-HA magnetic beads                    | Bimake        | Cat#B26201      |
| RiboFECT CP Transfection Kit              | RiboBio       | Cat#C10511-05   |
| Purified human Protein His-PD-L1          | Sino          | Cat#10084-H08H  |
|                                           | Biological    |                 |
| Puromycin (CL13900) 2HCl                  | Selleck       | Cat#S7417       |
|                                           | Chemicals     |                 |
| Polybrene                                 | Solarbio life | Cat#H8761       |
|                                           | sciences      |                 |
| Turbofect Transfection reagent            | Thermo        | Cat#R0531       |
|                                           | Scientific    |                 |
| <hr/>                                     |               |                 |
| Experimental models: Cell lines           |               |                 |
| <hr/>                                     |               |                 |

|                                          |            |              |
|------------------------------------------|------------|--------------|
| A375                                     | ATCC       | Cat#CRL-1619 |
| SK-MEL-28                                | ATCC       | Cat#HTB-72   |
| A549                                     | In our lab | N/A          |
| H460                                     | In our lab | N/A          |
| B16F10                                   | ATCC       | Cat#CRL-6475 |
| LLC                                      | ATCC       | Cat#CRL-1642 |
| HEK293T                                  | In our lab | N/A          |
| <b>Oligonucleotides</b>                  |            |              |
| Control siRNA1                           | GenePharma | N/A          |
| 5'-GAAATGTACTGCGCGTGGAGAC-3'             |            |              |
| Ubqln4-siRNA1                            | GenePharma | N/A          |
| 5'-GGTCAGGGATGTTCAATAG-3'                |            |              |
| Ubqln4-siRNA2                            | GenePharma | N/A          |
| 5'-CAATAACCCTGAACTCATG-3'                |            |              |
| Human sgUBQLN4#1                         | Shanghai   | N/A          |
| Forward: 5'-caccgtggggtccgggatatcccaa-3' |            |              |
| Human sgUBQLN4#1                         | Shanghai   | N/A          |
| Reverse: 5'-aaacttgggatatcccgaccac-3'    |            |              |
| Human sgUBQLN4#2                         | Shanghai   | N/A          |
| Forward: 5'-caccgctgtactaccttggaccg-3'   |            |              |
| Human sgUBQLN4#2                         | Shanghai   | N/A          |
| Reverse: 5'-aaaccggtcaaggaggtagtagc-3'   |            |              |
| Human PD-L1 primer                       | Shanghai   | N/A          |
| Forward:5'-TATGGTGGTGCCGACTACAA-3'       |            |              |
| Human PD-L1 primer                       | Shanghai   | N/A          |
| Reverse:5'-TGCTTGTCAGATGACTTCG-3'        |            |              |
| GAPDH primer                             | Shanghai   | N/A          |
| Forward:5'-CATGAGAAGTATGACAACAGCCT-3'    |            |              |
| GAPDH primer                             | Shanghai   | N/A          |

---

|                                      |                |  |
|--------------------------------------|----------------|--|
| Reverse:5'-AGTCCTTCCACGATACCAAAGT-3' | sangon biotech |  |
|--------------------------------------|----------------|--|

---

|                                        |  |  |
|----------------------------------------|--|--|
| Experimental models: Organisms/strains |  |  |
|----------------------------------------|--|--|

---

|                              |          |     |
|------------------------------|----------|-----|
| C57BL/6J                     | Shanghai | N/A |
|                              | SLAC     |     |
| CD73 <sup>-/-</sup> C57BL/6J | Shanghai | N/A |
|                              | SLAC     |     |

---

|                         |  |  |
|-------------------------|--|--|
| Software and Algorithms |  |  |
|-------------------------|--|--|

---

|                    |                        |                                                                   |
|--------------------|------------------------|-------------------------------------------------------------------|
| GraphPad Prism 5.0 | GraphPad Software, Inc | <a href="https://www.graphpad.com/">https://www.graphpad.com/</a> |
| CRISPR design      | N/A                    | <a href="http://crispr.mit.edu/">http://crispr.mit.edu/</a>       |
| FlowJo 10.0        | TreeStar               | N/A                                                               |
| Image Lab          | Bio-Rad                | <a href="https://www.bio-rad.com">https://www.bio-rad.com</a>     |
| Prism 8            | GraphPad               | <a href="https://www.graphpad.com/">https://www.graphpad.com/</a> |

---



**Supplementary Table 2. Clinicopathologic characteristics of anti-PD-1 monotherapy cohorts.**

| PID | Gender | Age | Subtype                  | Site       | Tumor lesion       | TNM stage | Stage      | PS score | PFS months | Response | Metastatic Lesion                                |
|-----|--------|-----|--------------------------|------------|--------------------|-----------|------------|----------|------------|----------|--------------------------------------------------|
| 1   | Female | 46  | Acral                    | metastatic | Left heel          | T2bN2cM0  | Stage III  | 1        | 4          | NR       | Popliteal lymph nodes                            |
| 2   | Male   | 71  | Nodular                  | metastatic | Left leg           | T3bN3M1a  | Stage IV   | 1        | 6          | NR       | Inguinal lymph nodes, left leg skin              |
| 3   | Female | 37  | Acral                    | primary    | Left heel          | T1aN1aM0  | Stage IIIA | 1        | 7.5+       | R        | Popliteal lymph node                             |
| 4   | Female | 58  | Acral                    | primary    | Left heel          | T4bN1aM0  | Stage IIIB | 1        | 7.5+       | R        | Inguinal lymph node                              |
| 5   | Male   | 68  | Acral                    | primary    | Left heel          | T3bN1aM0  | Stage IIIA | 1        | 7.5+       | R        | Inguinal lymph node                              |
| 6   | Female | 11  | Nodular                  | primary    | Left leg           | T4aN2bM0  | Stage IIIB | 1        | 7.5+       | R        | Inguinal lymph nodes                             |
| 7   | Female | 68  | Acral                    | primary    | Right heel         | T3bN2bM1c | Stage IV   | 1        | 6.5+       | R        | Inguinal lymph nodes, Lung                       |
| 8   | Female | 64  | Acral                    | primary    | Right heel         | T4bN1aM0  | Stage IIIB | 1        | 7+         | R        | Inguinal lymph node                              |
| 9   | Male   | 50  | Nodular, with ulceration | primary    | Right heel         | T4bN0M0   | Stage IIC  | 1        | 7.5+       | R        | None                                             |
| 10  | Female | 71  | Acral                    | metastatic | Right foot         | T2N1M1C   | Stage IV   | 1        | 3          | NR       | Lung, brain                                      |
| 11  | Female | 35  | Nodular                  | primary    | Left back          | TxN2M1    | Stage IV   | 1        | 12         | R        | Liver, bone, brain                               |
| 12  | Female | 56  | Acral                    | primary    | Right heel         | T1bN1aM0  | Stage IIIA | 1        | 7.5+       | R        | Inguinal lymph node                              |
| 13  | Female | 70  | Nodular                  | primary    | Right foot         | T4bN2bM1a | Stage IV   | 1        | 6          | NR       | Neck and inguinal lymph nodes                    |
| 14  | Male   | 46  | Nodular                  | primary    | Scalp              | T4bN0M1   | Stage IV   | 1        | 5          | NR       | Lung                                             |
| 15  | Female | 64  | Superficial spreadin     | metastatic | Left foot          | T2bN0M1a  | Stage IV   | 1        | 9          | R        | Scalp, gastric area                              |
| 16  | Female | 64  | Nodular                  | metastatic | Right leg          | TxN2M0    | Stage IIIA | 1        | 2          | NR       | Inguinal lymph nodes                             |
| 17  | Female | 56  | Acral                    | primary    | Left thumb         | T4bN3cM1c | Stage IV   | 1        | 19+        | R        | Inguinal and retroperitoneal lymph nodes         |
| 18  | Female | 38  | Nodular                  | primary    | Right index finger | T3aN2bM0  | Stage IIIB | 1        | 21+        | R        | Axillary, subclavian and elbow fossa lymph nodes |
| 19  | Female | 75  | Nodular                  | metastatic | Right finger       | T3bN3M0   | Stage IIIC | 1        | 3          | NR       | Axillary and chest wall lymph nodes              |

Patients were stratified into response groups based on RECIST 1.1 criteria. TNM stage based on the 8th Edition Melanoma Stage Classification. PFS, progression-free survival; R, response; NR, non-response.

**Supplementary Table 3. The list of 30 candidate proteins detected by MS.**

| Protein ID | Avg. Mass | Description                                                                        |
|------------|-----------|------------------------------------------------------------------------------------|
| 35         | 53652     | Vimentin sapiens GN=VIM                                                            |
| 48         | 33296     | Prohibitin-2 sapiens GN=PHB2                                                       |
| 47         | 28994     | Emerin sapiens GN=EMD                                                              |
| 118        | 36984     | Serine/threonine-protein phosphatase PP1-gamma catalytic subunit sapiens GN=PPP1CC |
| 70         | 38659     | Putative annexin A2-like protein sapiens GN=ANXA2P2                                |
| 69         | 38604     | Annexin A2 sapiens GN=ANXA2                                                        |
| 142        | 39233     | Pyruvate dehydrogenase E1 component subunit beta mitochondrial sapiens GN=PDHB     |
| 194        | 226530    | Myosin-9 sapiens GN=MYH9                                                           |
| 2741       | 58887     | Solute carrier family 35 member F5 sapiens GN=SLC35F5                              |
| 3252       | 171197    | Transient receptor potential cation channel subfamily M member 2 sapiens GN=TRPM2  |
| 61         | 34930     | Leucine-rich repeat-containing protein 59 sapiens GN=LRRC59                        |
| 234        | 55537     | COP9 signalosome complex subunit 1 sapiens GN=GPS1                                 |
| 236        | 53445     | Serine/threonine-protein kinase ULK3 sapiens GN=ULK3                               |
| 202        | 63853     | Ubiquilin-4 sapiens GN=UBQLN4                                                      |
| 4605       | 41443     | Circadian-associated transcriptional repressor sapiens GN=CIART                    |
| 4612       | 52186     | General transcription factor IIH subunit 4 sapiens GN=GTF2H4                       |
| 4629       | 64685     | Myosin light chain kinase 2 skeletal/cardiac muscle sapiens GN=MYLK2               |
| 1691       | 125830    | Angiopoietin-1 receptor sapiens GN=TEK                                             |
| 2992       | 138109    | Filamin-A-interacting protein 1 sapiens GN=FILIP1                                  |
| 4967       | 179402    | Thrombospondin type-1 domain-containing protein 7B sapiens GN=THSD7B               |
| 5417       | 316911    | Protein PRRC2C sapiens GN=PRRC2C                                                   |
| 196        | 27077     | Clathrin light chain A sapiens GN=CLTA                                             |
| 148        | 307550    | A-kinase anchor protein 13 sapiens GN=AKAP13                                       |
| 4601       | 288984    | Spectrin beta chain non-erythrocytic 4 sapiens GN=SPTBN4                           |
| 224        | 138386    | Sperm-specific antigen 2 sapiens GN=SSFA2                                          |
| 4634       | 51544     | GDNF family receptor alpha-2 sapiens GN=GFRA2                                      |
| 4654       | 66959     | CREB-regulated transcription coactivator 3 sapiens GN=CRTC3                        |
| 4710       | 103702    | Calcium homeostasis endoplasmic reticulum protein sapiens GN=CHERP                 |
| 4713       | 106834    | Centromere protein C sapiens GN=CENPC                                              |
| 4846       | 140467    | Contactin-associated protein-like 3B sapiens GN=CNTNAP3B                           |
